# Supplementary material for: Dihydrothiazolo ring-fused 2-pyridone antimicrobial compounds treat Streptococcus pyogenes skin and soft tissue infection
Source: PubMed Central journal article supplement (PMC11296344; doi:10.1126/sciadv.adn7979), 2024-08-02
Supplement: sciadv.adn7979_sm.pdf [file sciadv.adn7979_sm.pdf]

Supplementary Materials for  
**Dihydrothiazolo ring-fused 2-pyridone antimicrobial compounds treat  
*Streptococcus pyogenes* skin and soft tissue infection**

Zongsen Zou *et al.*

Corresponding author: Fredrik Almqvist, fredrik.almqvist@umu.se; Scott J. Hultgren, hultgren@wustl.edu;  
Michael G. Caparon, caparon@wustl.edu

*Sci. Adv.* **10**, eadn7979 (2024)  
DOI: 10.1126/sciadv.adn7979

**The PDF file includes:**

Figs. S1 to S6  
Tables S1 to S3

**Other Supplementary Material for this manuscript includes the following:**

Data S1

## SUPPLEMENTARY FIGURES

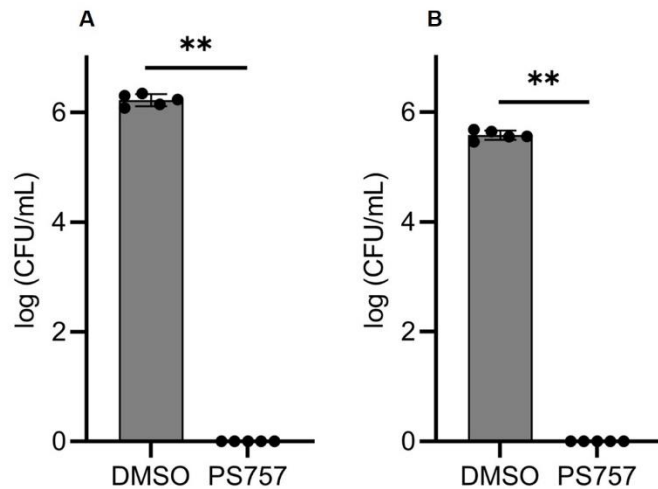

**Fig. S1. GmPcide PS757 demonstrates robust bactericidal activity against the exponential- and stationary-phase of *S. pyogenes* HSC5 cells. (A)** Exponential-phase (7 hours post inoculum) *S. pyogenes* HSC5 cells treated under bactericidal (20  $\mu$ M) concentration of PS757 for 12 hours were observed with > 6.0 logCFU reduction. **(B)** Stationary-phase (14 hours post inoculum) *S. pyogenes* HSC5 cells treated under bactericidal (20  $\mu$ M) concentration of PS757 for 12 hours were observed with > 5.0 logCFU reduction. Statistics were performed with Mann-Whitney U test.  $P \leq 0.05$  is considered as statistically significant. \* $P \leq 0.05$ , \*\* $P < 0.01$ , \*\*\* $P < 0.001$ , \*\*\*\* $P < 0.0001$ , ns indicates not significant.

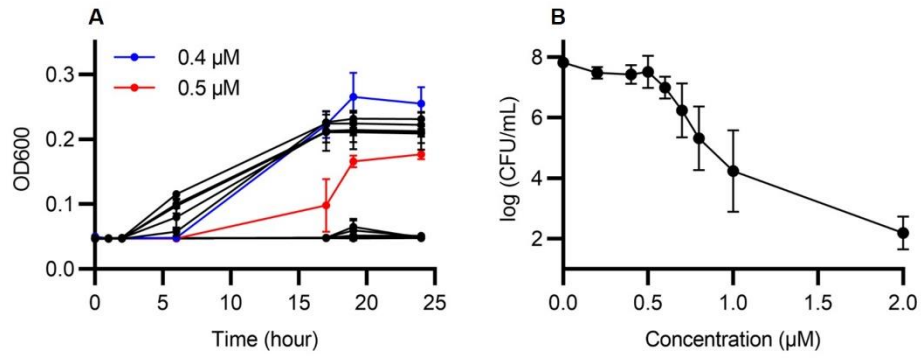

**Fig. S2.** Sublethal concentration of GmPcide PS757 against *S. pyogenes* HSC5 was determined in microplate assay using C medium by measuring both **(A)** OD600 and **(B)** CFU, which identified 0.4  $\mu\text{M}$  as the sublethal concentration of PS757 against *S. pyogenes* HSC5.

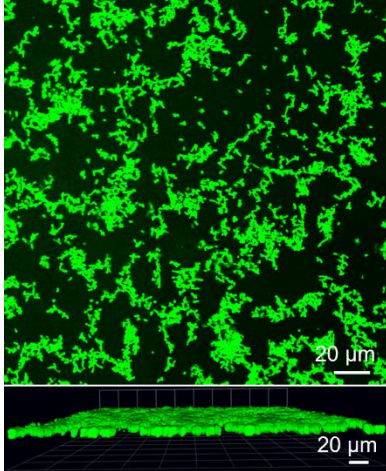

**Fig. S3. Immunofluorescent confocal microscopy characterization of *S. pyogenes* HSC5 biofilm at 24 hrs post-inoculation.** A dense biofilm with an approximate thickness of 9.5 μm was observed.

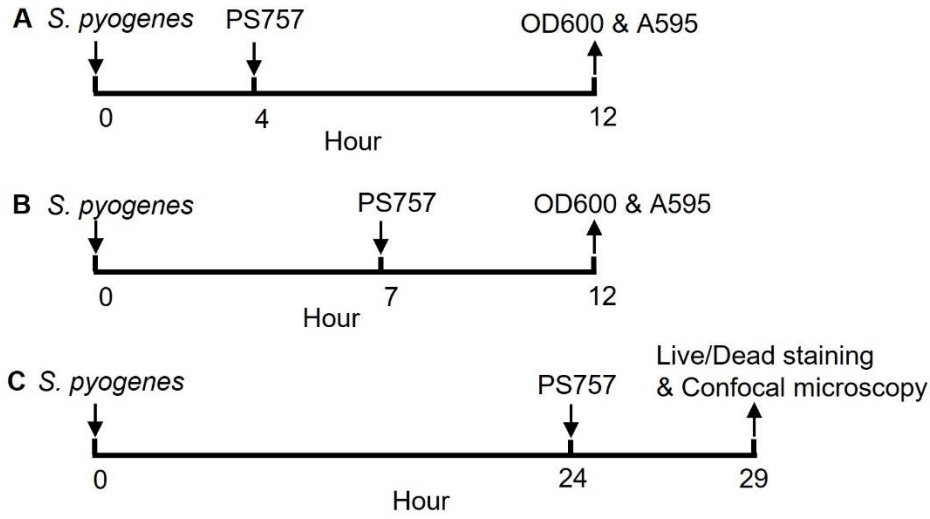

**Fig. S4. GmPcide PS757 treatment to different phases of *S. pyogenes* biofilm. (A)** GmPcide PS757 treatment to *S. pyogenes* HSC5 biofilm at 4 hrs during initiation phase. **(B)** GmPcide PS757 treatment to *S. pyogenes* HSC5 biofilm 7 hrs during maturing development. **(C)** GmPcide PS757 treatment to mature *S. pyogenes* HSC5 biofilm at 24 hrs.

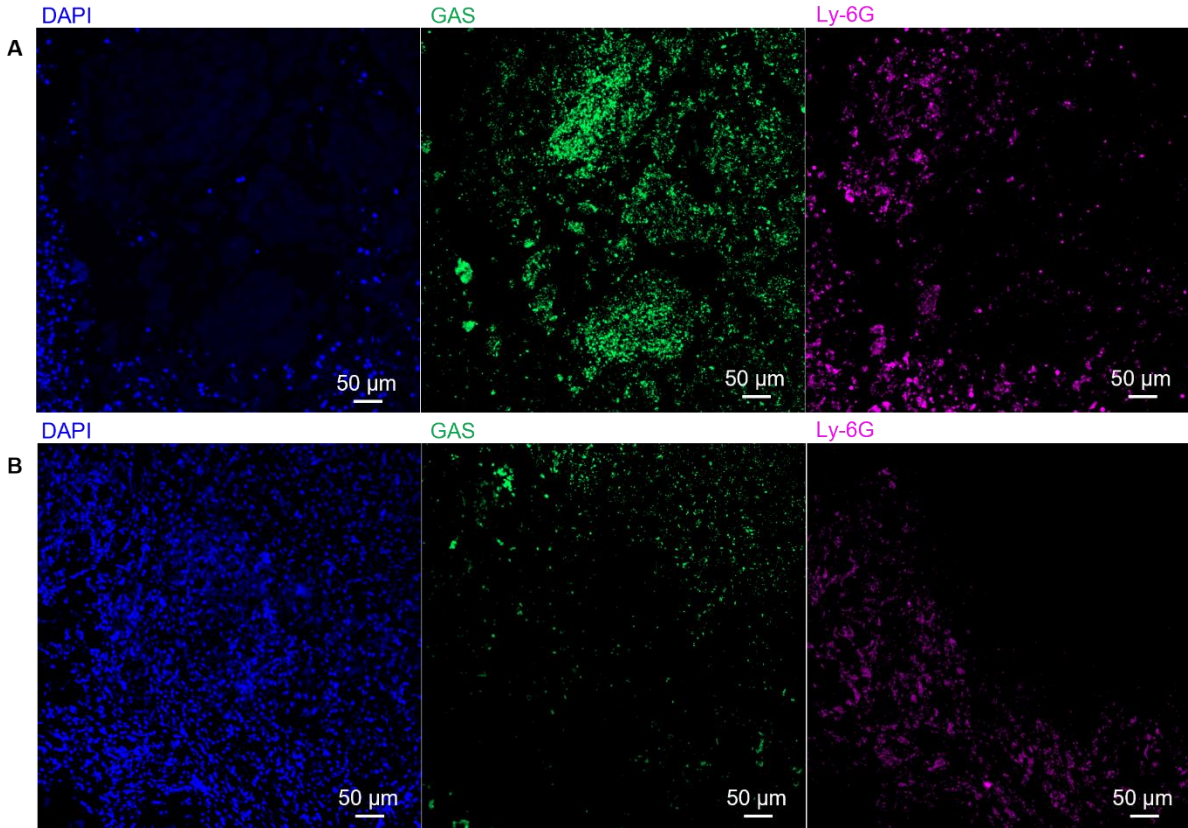

**Fig. S5. Immunofluorescence microscopy characterizations of thigh tissue samples from vehicle-treated (DMSO) (A) and PS757-treated (B) mice. Host cell nuclei, *S. pyogenes* HSC5, and polymorphonuclear neutrophils were stained with DAPI, GAS, and Ly-6G antibodies, respectively.**

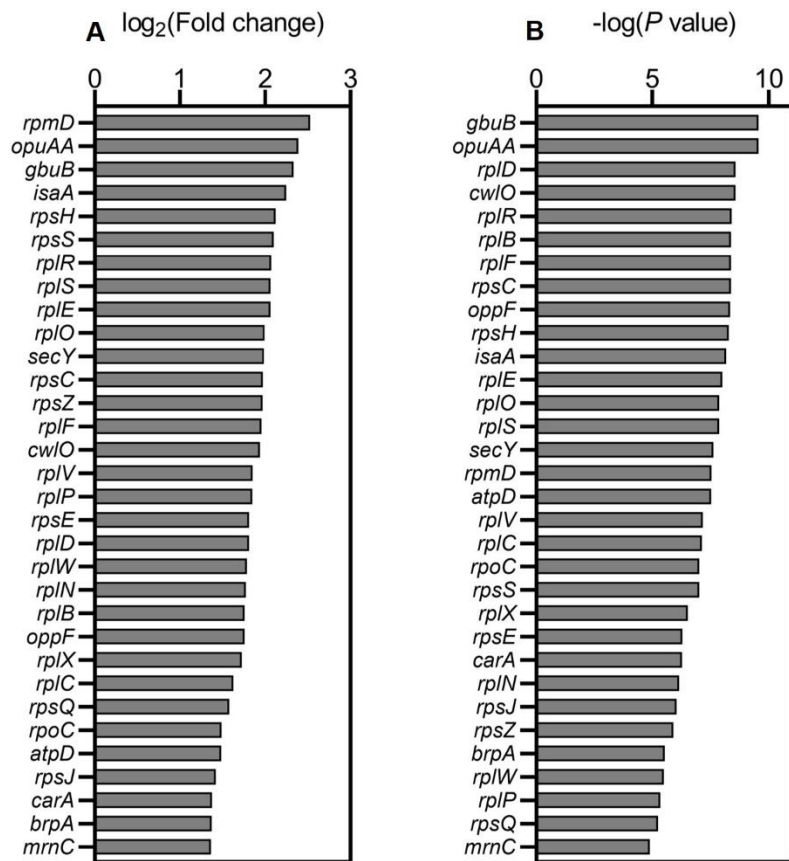

**Fig. S6.** Differentially expressed genes (DEGs) induced by PS757 treatment were identified as  $\log_2(\text{FC}) > 0.5$  and  $P < 0.05$  in the comparative RNA-seq analysis. Among DEGs, two more stringent selection criteria,  $|\log_2(\text{FC})|$  **(A)** and  $-\log(P)$  **(B)**  $> 99\%$  confidence intervals (CI) upper limits were applied to select the most up-regulated group of genes, which identified 32 most up-regulated genes featuring the involvement of two ribosomal protein-associated pathways, Rpl and Rps.

## SUPPLEMENTARY TABLES

**Table S1.** MIC and MBC concentrations of four standard-of-care antibiotics against *S. pyogenes* HSC5

| Strain                  | Antibiotic   | Concentration ( $\mu\text{M}$ ) |      |
|-------------------------|--------------|---------------------------------|------|
|                         |              | MIC                             | MBC  |
| <i>S. pyogenes</i> HSC5 | Penicillin   | 0.09                            | 0.35 |
|                         | Cefotaxime   | 0.13                            | 0.52 |
|                         | Vancomycin   | 0.17                            | 0.34 |
|                         | Azithromycin | 0.32                            | 5.10 |



**Table S2.** Antimicrobial synergy of GmPcide PS757 with four standard-of-care antibiotics examined by checkerboard method and E test.

| Strain                     | Combined treatment   |              | MIC ( $\mu\text{M}$ ) |          | FICI |
|----------------------------|----------------------|--------------|-----------------------|----------|------|
|                            |                      |              | Alone                 | Combined |      |
| <i>S. pyogenes</i><br>HSC5 | PS757 + Penicillin   | PS757        | 0.78                  | 0.39     | 0.75 |
|                            |                      | Penicillin   | 0.09                  | 0.02     |      |
|                            | PS757 + Cefotaxime   | PS757        | 0.78                  | 0.39     | 0.75 |
|                            |                      | Cefotaxime   | 0.13                  | 0.03     |      |
|                            | PS757 + Vancomycin   | PS757        | 0.78                  | 0.39     | 1.50 |
|                            |                      | Vancomycin   | 0.17                  | 0.17     |      |
|                            | PS757 + Azithromycin | PS757        | 0.78                  | 0.39     | 1.50 |
|                            |                      | Azithromycin | 0.32                  | 0.32     |      |

**Table S3.** The list of most down- and up-regulate *S. pyogenes* genes induced by sublethal PS757 treatment identified by comparative transcriptomic analysis.

| Differentially expressed levels (DEs) | Differentially expressed genes (DEGs)                                                                                                                                                                       |
|---------------------------------------|-------------------------------------------------------------------------------------------------------------------------------------------------------------------------------------------------------------|
| Most down-regulated                   | <i>emm5, malQ, udp, malX, nupX, ycjP, arlR, NA, NA</i>                                                                                                                                                      |
| Most up-regulated                     | <i>rpmD, opuAA, gbuB, isaA, rpsH, rpsS, rplR, rplS, rplE, rplO, secY, rpsC, rpsZ, rplF, cwI/O, rplV, rplP, rpsE, rplD, rplW, rplN, rplB, oppF, rplX, rplC, rpsQ, rpoC, atpD, rpsJ, carA, brpA, mrnC, NA</i> |
